## CORRECTION

# Correction: "I was hungry and you gave me food": Religiosity and attitudes toward redistribution

The *PLOS ONE* Staff

There are errors in the Funding statement. The publisher apologizes for the errors. The correct Funding statement is as follows: This research was supported by grants from Turkish Academy of Sciences Young Scientist Award Program (Türkiye Bilimler Akademisi GEBIP2015; Dr. Gizem Arıkan) and Israeli Science Foundation (ISF676/13, Dr. Pazit Ben-Nun Bloom).

## Reference

1. Arıkan G, Ben-Nun Bloom P (2019) "I was hungry and you gave me food": Religiosity and attitudes toward redistribution. *PLoS ONE* 14(3): e0214054. <https://doi.org/10.1371/journal.pone.0214054> PMID: [30901376](https://pubmed.ncbi.nlm.nih.gov/30901376/)

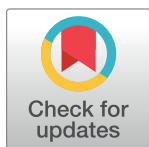

## OPEN ACCESS

**Citation:** The *PLOS ONE* Staff (2019) Correction: "I was hungry and you gave me food": Religiosity and attitudes toward redistribution. *PLoS ONE* 14(4): e0215935. <https://doi.org/10.1371/journal.pone.0215935>

**Published:** April 18, 2019

**Copyright:** © 2019 The PLOS ONE Staff. This is an open access article distributed under the terms of the [Creative Commons Attribution License](https://creativecommons.org/licenses/by/4.0/), which permits unrestricted use, distribution, and reproduction in any medium, provided the original author and source are credited.
